# Laminins promote the locomotion of skeletal myoblasts via the alpha 7 integrin receptor

Chung-Chen Yao<sup>1</sup>, Barry L. Ziober<sup>1</sup>, Ann E. Sutherland<sup>1,\*</sup>, Donna L. Mendrick<sup>3</sup> and Randall H. Kramer<sup>1,2,†</sup>

<sup>1</sup>Department of Stomatology, School of Dentistry and <sup>2</sup>Department of Anatomy, School of Medicine, University of California San Francisco, San Francisco, CA 94143-0512, USA

<sup>3</sup>Human Genome Sciences, 9410 Key West Avenue, Rockville, MD 20850, USA

\*Present address: Department of Cell Biology, University of Virginia, Charlottesville, VA 22908, USA

†Author for correspondence (e-mail: randyk@itsa.ucsf.edu)

## SUMMARY

The  $\alpha 7\beta 1$  integrin is specifically expressed by skeletal and cardiac muscles, and its expression and alternative mRNA splicing at the cytoplasmic domain are developmentally regulated. We analyzed the role of  $\alpha 7$  integrin in mediating myoblast adhesion and motility on different laminin isoforms. Mouse C2C12 and MM14 myoblast cell lines were found by flow cytometry and immunoprecipitation to express high levels of the  $\alpha 7$  integrin. Overall expression of  $\alpha 7$  increased as the C2C12 myoblasts differentiated; myoblasts expressed only the  $\alpha 7B$  cytoplasmic variant whereas in differentiating myotubes  $\alpha 7A$  increased markedly. Function-perturbing monoclonal antibodies generated to  $\alpha 7$  integrin efficiently blocked both adhesion and migration of MM14 and C2C12 mouse myoblasts on laminin 1. Other studies with MM14 myoblasts showed that  $\alpha 7$  is also a receptor for laminin 2/4 (human placental

merosins) but not for epithelial-cell-specific laminin 5. Blocking antibody to  $\alpha 7$  only partially inhibited adhesion to laminin 2/4 but almost completely blocked motility on this substrate. Finally, to assess the potential role of the  $\alpha 7$  cytoplasmic domain, CHO cells were stably transfected to express chimeric  $\alpha 5$  cDNA constructs containing the wild-type  $\alpha 5$  or the  $\alpha 7A$  or  $\alpha 7B$  cytoplasmic domain; all forms of the integrin showed identical activities for adhesion, migration, proliferation, and matrix assembly on fibronectin substrates. These results established that  $\alpha 7\beta 1$  receptor can promote myoblast adhesion and motility on a restricted number of laminin isoforms and may be important in myogenic precursor recruitment during regeneration and differentiation.

Key words:  $\alpha 7$  Integrin, Laminin, Myoblast, Adhesion, Motility

## INTRODUCTION

Laminins are a major component of the basement membrane that surrounds individual skeletal muscle myofibers and are important ligands that promote diverse cellular responses. Interaction of cell adhesion receptors with laminin-rich basement membrane is important in maintaining normal tissue organization and in tissue renewal and repair. Recent studies indicate there are at least 10 trimeric isoforms of laminin formed from different combinations of  $\alpha$ ,  $\beta$ , and  $\gamma$  subunit chains (Timpl and Brown, 1994). Furthermore, the different laminin isoforms are tissue-specific and are expressed in a developmentally regulated pattern. There are at least three different laminin isoforms located at different domains on skeletal muscles: laminin-2 (merosin:  $\alpha 2$ ,  $\beta 1$ , and  $\gamma 1$ ) between muscle fibers; laminin-3 (s-laminin:  $\alpha 1$ ,  $\beta 2$ , and  $\gamma 1$ ) at neuromuscular junctions; and laminin-4 (s-merosin:  $\alpha 2$ ,  $\beta 2$ , and  $\gamma 1$ ) at myotendinous junctions (Engvall et al., 1990). However, the functional importance of this distribution and what determines the differential distribution of laminin isoforms are still unknown.

It has been shown that laminin 1 specifically stimulates rodent myoblast proliferation and locomotion (Goodman et al.,

1989; Ocalan et al., 1988) and also promotes myogenesis in cultured skeletal myoblasts (Foster et al., 1987; von der Mark and Ocalan, 1989). In addition to laminins, other ECM components and their receptors, as well as specific growth factors, play an important role in regulating myoblast proliferation and differentiation (Sastry et al., 1996; McDonald et al., 1995). Different cell types may have a special biological response to laminin, and this may result from the specific cellular environment and the different repertoire of integrin receptors expressed by the individual cells (Chan et al., 1992). At least eight members of the integrin family,  $\alpha 1\beta 1$ ,  $\alpha 2\beta 1$ ,  $\alpha 3\beta 1$ ,  $\alpha 6\beta 1$ ,  $\alpha 7\beta 1$ ,  $\alpha v\beta 3$ , and  $\alpha 6\beta 4$ , have to date been reported to bind different laminin isoforms. Several  $\alpha$  subunits associated with  $\beta 1$  are present in muscle tissue including  $\alpha 1$ , 3, 4, 5, 6, 7 and 9 (Bronner-Fraser et al., 1992; Duband et al., 1992; Enomoto et al., 1993; George-Weinstein et al., 1993; Hirsch et al., 1994; Lakonishok et al., 1992; McDonald et al., 1995; Steffensen et al., 1992). It has been shown that anti- $\beta 1$  antibody inhibits myoblast migration on laminin (von der Mark et al., 1991) and it has been suggested that  $\alpha 7\beta 1$  integrin directs motility of satellite-cell-derived myoblasts along laminin-rich basement membranes during skeletal muscle regeneration (von der Mark et al., 1991).

In the present study, we generated monoclonal antibodies against  $\alpha 7$  integrin to study its distribution and function. We found that on laminin 1 substrates, myoblasts attached and spread rapidly and  $\alpha 7$  integrin became concentrated in focal adhesion sites. Function-perturbing antibodies against the  $\alpha 7$  integrin blocked myoblast adhesion to laminin 1. Moreover,  $\alpha 7\beta 1$  integrin bound not only to laminin 1 but also to a mixture of laminin 2 and 4.  $\alpha 7$  did not bind efficiently to laminin 5. Finally, we examined whether chimeric constructs of the  $\alpha 5$  extracellular domain joined with the cytoplasmic A or B variant domains of  $\alpha 7$  could differentially contribute to cellular events in transfected cells.

## MATERIALS AND METHODS

### Cell culture and reagents

Rat-2 cells (Topp, 1981) were grown in DMEM H-21 with 10% FBS (Cell Culture Facility, University of California, San Francisco, CA). The C2C12 mouse myoblast cell line (kindly provided by Dr Rik Derynck, University of California, San Francisco, CA) was maintained in DMEM H-21 with 20% FBS (Yaffe and Saxel, 1977). C2C12 cells were induced to differentiate into myotubes by growing in DMEM with 2% horse serum. The MM14 mouse myoblast cell line (kindly provided by Dr Stephen Hauschka, University of Washington, Seattle, WA) was maintained in Ham's F10 medium (CaCl<sub>2</sub> adjusted to 1.2 mM) with 15% horse serum and 2 ng/ml basic fibroblast-growth factor (bFGF) (Campbell et al., 1995). The CHO  $\alpha 5\beta 1$ -integrin-deficient B2 variant cell line (Bauer et al., 1993) was kindly provided by Dr Rudolph Juliano (University of North Carolina, Chapel Hill, NC) and maintained in MEM  $\alpha$  without nucleosides with 10% FBS.

Laminin 1 was purified from mouse EHS tumor as previously described (Kramer et al., 1991). Human placental laminin (a mixture of laminin 2 and 4: Delwel et al., 1994; Spinardi et al., 1995) was purchased from Gibco-BRL (Gaithersburg, MD). Purified human laminin 5 was kindly provided by Dr Robert Burgeson (Cutaneous Biology Research Center, Boston, MA). Human plasma fibronectin was purchased from Collaborative Biomedical Products (Bedford, MA).

Antibodies against integrin subunits included hamster anti-mouse  $\alpha 1$  monoclonal antibody (mAb) Ha31/8, anti-mouse  $\alpha 2$  mAb Ha1/29 and anti-mouse  $\beta 1$  mAb Ha2/11 (Mendrick et al., 1995); rabbit anti-mouse  $\alpha 3$  cytoplasmic region antiserum, kindly provided by Dr Hannu Larjava (University of British Columbia, Vancouver, Canada); rat anti-human  $\alpha 5$  mAb B2G2, kindly provided by Dr Caroline Damsky (University of California, San Francisco, CA), and mouse anti-human  $\alpha 5$  mAb 6F4, a kind gift from Dr Ralph Isberg (Tufts University, Boston, MA). Rat anti-mouse  $\alpha 4$  mAb R1-2, rat anti-mouse  $\alpha 5$  mAb IIA1 and rat anti-mouse  $\beta 4$  mAb 346-11A were purchased from Pharmingen (San Diego, CA); rat anti-human  $\alpha 6$  mAb GoH3 was purchased from AMAC (Westbrook, ME). The rabbit polyclonal antibodies (pAb) 22780 and 1211 were against peptide sequences specific to the  $\alpha 7A$  cytoplasmic region (NSPSSSFRTNYHR) and to the  $\alpha 7B$  cytoplasmic region (GTIQRSNWGN SQWEGSDAH), respectively, as described (Martin et al., 1996; Yao et al., 1996). Mouse mAb against vinculin (hVIN-1) was purchased from Sigma (St Louis, MO). Fluorescein-conjugated secondary antibodies were obtained from Jackson ImmunoResearch Laboratories (West Grove, PA). Streptavidin-HRP and ECL kit were purchased from Amersham (Arlington Heights, IL). All reagents were purchased from Sigma (St Louis, MO) unless specified.

### Production of monoclonal antibodies to mouse $\alpha 7$

Mouse  $\alpha 7$  X2B cDNA (Ziober et al., 1993) cloned in a RSV

expression vector (Invitrogen, San Diego, CA) was transfected into Rat-2 cells by using the calcium phosphate method (Mammalian Transfection Kit from Stratagene, La Jolla, CA). Individual clones were isolated and analyzed by northern blotting, western blotting and enhanced adhesion to laminin substrates. Two clones (6 and 20) that were high expressors of mouse  $\alpha 7$  were selected and used for mAb production in syngeneic Fisher rats. Rats were injected with live cells ( $5 \times 10^6$ ) once, either intraperitoneally or subcutaneously. Titers of tail bleeds were monitored by FACS using  $\alpha 7$  MCF-7 transfectants; the MCF-7 transfectants were generated by transfecting with the mouse  $\alpha 7$  X2B cDNA in a CMV promoter construct (Yao et al., 1996). The fusions were performed as described (Harlow and Lane, 1988) with polyethylene glycol 1500 (from Boehringer Mannheim, Indianapolis, IN) using isolated spleen cells and Sp2/0 mouse myeloma cells at the ratio of 3:1. The cells were plated in 96-well tissue culture plates in Opti-MEM medium (from Gibco BRL, Gaithersburg, MD) supplemented with 20% heat-inactivated fetal bovine serum, thymidine, adenine, Na-pyruvate, glycine, glutamine, oxaloacetate, hypoxanthine, insulin, transferrin, sodium selenite, Mito+ serum extender (Collaborative Biomedical Products, Becton Dickinson, Bedford, MA) and IL-6 (Gibco BRL). Hybridoma supernatants were screened by using whole-cell ELISA on  $\alpha 7$ -expressing clone 23 of K1735 mouse melanoma cells. Positive clones were further screened by immunoprecipitation of lysates from biotin surface-labeled K1735 melanoma cells. Screening for function-perturbing antibodies was performed in adhesion assays for  $\alpha 7$  MCF-7 transfectants on laminin-1 substrates. Selected hybridomas were further subcloned by limiting dilution and were subtyped by using an isotyping system for rat immunoglobulins (Gibco BRL). Monoclonal antibodies were purified from hybridoma conditioned medium by passage over a Protein G-Sepharose 4 Fast Flow column (Pharmacia, Uppsala, Sweden) and elution with 0.1 M glycine-HCl, pH 2.7. Rat mAbs CA5 (IgG2b), CY4 (IgG2b) and CY8 (IgG2a) were found positive against  $\alpha 7$  integrin for immunoprecipitation and FACS; CY4 and CY8 were function-perturbing mAbs that inhibited  $\alpha 7$ -integrin-mediated adhesion on several cell types.

### Production of monoclonal antibodies to cytoplasmic regions of $\alpha 7$ integrin

Mouse mAb 3F4 (IgG2b) was generated in our laboratory against a peptide sequence of the  $\alpha 7B$  cytoplasmic region GTIQRSNWGN-SQWEGSDAH coupled to cationized BSA (Pierce, Rockford, IL). Details of all procedures have been described (Harlow and Lane, 1988). Briefly, the conjugated peptide was injected into A/J mice intraperitoneally with complete Freund's adjuvant once, and then with incomplete Freund's adjuvant three times with 2 weeks between injections. Serum titer was monitored by ELISA. The final booster was injected with peptide solution in PBS intravenously 3 days before fusion. After fusion was performed, the supernatants of hybridomas were screened by ELISA and positive clones were verified by immunoprecipitation of myoblasts and of MCF-7  $\alpha 7B$  transfectants. The hybridoma subtyping was performed with Isostrip (Boehringer Mannheim).

### Flow cytometry

Subconfluent cells were detached with 2 mM EDTA. Single-cell suspensions ( $10^6$ /ml) were incubated with optimal concentrations of primary mAb in wash buffer (2% normal goat serum in PBS) for 1 hour on ice, washed three times, and incubated with the goat anti-rat or anti-mouse secondary fluorescein-labeled antibodies for 30 minutes on ice. After washing again three times, the cells were stained with propidium iodide (1  $\mu$ g/ml) to identify non-viable cells. Flow cytometry was performed on a FACscan flow cytometer (Becton Dickinson). Control samples consisted of cells with or without secondary antibody binding. Any non-viable cells stained with propidium iodide were eliminated from the analysis.

### Immunoprecipitation of surface biotin-labeled cells

Confluent cultures of cells were washed twice with PBS and then labeled with NHS-LC-Biotin (Pierce), 1 mg/ml in cold PBS at 4°C for 90 minutes. Cells were washed twice with 50 mM glycine blocking buffer and incubated in this buffer for 10 minutes at 4°C. The cells were lysed in lysis buffer (PBS with 0.1 M Tris, pH 7.5, 2% NP-40, 2 mM PMSF and 1 mM *N*-ethylmaleimide). After pre-clearing with Protein A beads, the lysate was mixed by rotation for  $\geq 3$  hours with primary antibody and Protein A beads. The beads were washed with the wash buffer (50 mM Tris, pH 7.4, 150 mM NaCl, 1 mM MgCl<sub>2</sub>, 0.5% NP-40, 0.1% BSA) three times and heated at 100°C in SDS sample buffer for 5 minutes. The supernatant was divided into two aliquots: one for non-reducing samples and one for reducing with 2-mercaptoethanol. Samples were separated by 7.5% SDS-PAGE under reduced and non-reduced conditions. The biotinylated proteins were detected by streptavidin-horseradish peroxidase and then enhanced chemiluminescence (ECL).

### Immunofluorescence staining

Cells were seeded on laminin-1 coated coverslips for 1 hour, washed with PBS and fixed with 2% paraformaldehyde in PBS. Cells were permeabilized with 0.4% Triton X-100 for 5 minutes and blocked with 10% normal goat serum in PBS for at least 1 hour. Samples were incubated with primary antibodies for 1 hour at room temperature, washed with PBS, and then incubated with FITC- or Rhodamine-labeled anti-rat or anti-mouse IgG for 1 hour at room temperature. After washing with PBS, the samples were mounted in Vectashield (Vector) and observed under a Nikon epifluorescence microscope.

### Cell adhesion assay

Microtiter plates (96-well Immulon plates, Dynatech) were coated with matrix proteins at the indicated concentrations in PBS for 1 hour at 37°C in a humidified atmosphere. Plates were washed with PBS and incubated with medium containing 0.1% BSA for 60 minutes in a CO<sub>2</sub> incubator to block nonspecific adhesion. Single-cell suspensions were prepared in DMEM with 0.1% BSA at  $4 \times 10^5$  cells/ml, added in triplicate to 96-well plates, and then incubated for 40-90 minutes at 37°C. Non-adherent cells were removed by shaking on a titer plate shaker (Lab-line Instruments) and washing with PBS. Cells were fixed with 1% formaldehyde, stained with 1% crystal violet, and solubilized in 2% SDS, and absorbance was then read at 562 nm. Cells bound to wheat germ agglutinin (10  $\mu$ g/ml) or collagen type I (100  $\mu$ g/ml) on a separate 96-well plate were used to indicate 100% attachment. Background cell adhesion to 1% BSA-coated wells was subtracted. The effect of specific antibody was tested by pre-incubating the cells with the hybridoma supernatants or dilutions of purified antibody on ice for 30 minutes prior to the assay.

### Migration assay

Cell migration was assayed in a modified Boyden chamber (Neuroprobe, Bethesda, MD) as described previously (Matsumoto et al., 1994). Briefly, an 8- $\mu$ m-porosity polyvinylpyrrolidone-free polycarbonate filter (Nucleopore, Pleasanton, CA) was precoated with ligand at the indicated concentration. The lower well of the chamber was filled with serum-free medium containing 0.1% BSA. In some studies, the lower chamber contained medium with or without bFGF as indicated. Cell suspensions were prepared from subconfluent cultures and resuspended to a final concentration of  $4 \times 10^5$  cells/ml in serum-free medium containing 0.1% BSA. A 50 ml aliquot of cell suspension was added to the upper chamber and then incubated for the indicated time at 37°C. Cells on the top of the filter were removed by wiping, and the filter was then fixed in 1% formaldehyde in PBS. Migrating cells were stained with 1% crystal violet, and nine randomly chosen fields from triplicate wells were counted at  $\times 400$  magnification.

### Generation of $\alpha 5/7$ integrin chimeras

Full-length human  $\alpha 5$  cDNA in PECE expression vector was obtained from Dr Erkki Ruoslahti (Cancer Research Center, La Jolla). The *SallI-XbaI* fragment was cloned into Bluescript plasmid (Stratagene). The *HindIII-XbaI* cytoplasmic region was deleted and replaced with PCR-generated  $\alpha 7A$  or  $\alpha 7B$  cytoplasmic fragments designed to have cohesive *HindIII-XbaI* ends. The cytoplasmic fragments were amplified by using DNA templates from reverse transcription of C2C12 myotube RNA with primer sets J1 (5'AATCTAGACCCAAG-GAGCCATCTTGGAA3') and J36 (5'CCCCCAAGCTTG-GCTTCTCCGTCGGAAC3') for  $\alpha 7A$  and primer sets J1 and J37 (5'CCCCGGGCTTGGATTCTCAAGCGGGCG3') for  $\alpha 7B$  for 20 cycles (94°C for 30 seconds, 55°C for 30 seconds, 72°C for 30 seconds). In order to generate an AAGCTT *HindIII* site for cloning purposes, a cysteine was replaced by a leucine at the  $\alpha 7A$  cytoplasmic domain near the transmembrane region (from KCGFFRR to KLGFFRR...). The  $\alpha 7B$  amino acid sequence at the cytoplasmic region remained unchanged (KLGFFKR...). The new cDNA constructs were sequenced through the altered regions. The chimeric human  $\alpha 5$ -mouse  $\alpha 7$  constructs were further cloned into pRC/CMV expression vectors (Invitrogen).

### Transfection and selection of CHO $\alpha 5$ -deficient variants

For transfection with  $\alpha 5/7$  chimeric constructs, a total of  $6 \times 10^6$  CHO B2 variant cells were resuspended in 0.8 ml Ca<sup>2+</sup>/Mg<sup>2+</sup>-free PBS and electroporated with 10  $\mu$ g *PvuI* linearized cDNA at 25  $\mu$ F, 600 V. Stable transfectants were selected in MEM  $\alpha$  without nucleosides with 10% FBS and 1 mg/ml G418. A panning procedure was devised for enrichment of positive  $\alpha 5$  expressers. Dishes were precoated with goat anti-mouse IgG (3  $\mu$ g/ml in 50 mM Tris-HCl, pH 9.5, at 4°C overnight) and then nonspecific binding was blocked with 1% BSA in PBS for 1 hour at room temperature. After detachment with 2 mM EDTA, cells were incubated in mAb 6F4 (mouse anti-human  $\alpha 5$ ), 5  $\mu$ g/ml in PBS containing 2% FBS for 45 minutes on ice. Then cells were plated onto antibody-coated dishes at 37°C and incubated for 30 minutes. Floating cells were removed by gentle washing with PBS containing 2% FBS. The cells remaining on the dish were expanded in medium containing G418. This 'panning' was repeated a second time after 3 days, and the resultant cells were sorted using 6F4 antibody and FITC-labeled goat anti-mouse secondary antibodies. Typically, nearly 60% of the population were positive. Sorted cells were expanded in medium with 1 mg/ml G418, and aliquots of these low-passage cells were stored frozen. For experiments, cells from frozen stocks were cultured and the expression level of  $\alpha 5$  was measured by FACS; assays were done within 2 weeks. Expression levels of  $\alpha 5$  in the transfectants were confirmed by immunoprecipitation with both mAb to  $\alpha 5$ - and  $\alpha 7$  cytoplasmic-specific antisera.

### Cell growth assays

Cells were plated at 2,000 cells/well in four 96-well tissue culture plates in triplicate. Four conditions were applied to each cell line: low-serum or high-serum supplement with or without fibronectin substrates. For each plate, wells in half of the plate were precoated with 10  $\mu$ g/ml fibronectin for 1 hour before seeding. Cells were divided and resuspended in 10% serum or in 0.2% serum and seeded onto wells with or without fibronectin coating. Two hours after seeding and on days 2, 3 and 4, plates were washed and fixed with 1% formaldehyde in PBS. On day 4 the cells were stained with 1% crystal violet, and solubilized in 2% SDS and absorbance was then read at 562 nm.

### Fibronectin matrix assembly assays

Transfectants were plated at approximately 40% confluence in Lab-Tek 8-chamber culture slides (Nunc) in medium containing 50  $\mu$ g/ml of purified human fibronectin. On day 3, the cell monolayer was fixed with 1% formaldehyde and stained with a rabbit anti-fibronectin antiserum followed by fluorescein-conjugated goat anti-rabbit IgG

antibodies as previously described (Wu et al., 1995). The cells were observed under a Nikon epifluorescence microscope.

## RESULTS

### MM14 and C2C12 myoblasts express a similar repertoire of laminin-binding integrins

Laminin induces myoblast motility and subsequently promotes differentiation and myogenesis (Ocalan et al., 1988; von der Mark and Ocalan, 1989). To identify the specific integrins responsible for the laminin-induced response, we first identified the repertoire of integrins expressed on the two murine myoblast lines, MM14 and C2C12. Both cell lines were derived from adult muscle satellite cells, express muscle-specific markers, are competent for differentiating into myotubes and can be incorporated into functional muscle fibers after transplantation in vivo (Linkhart et al., 1981; Yaffe and Saxel, 1977). The MM14 cells have been reported to exhibit different migratory phenotypes on laminin versus fibronectin substrates (Ocalan et al., 1988; von der Mark and Ocalan, 1989), and the C2C12 cells have been widely used for studies of myoblast differentiation and the fate of myoblast transplantation (Blau and Hughes, 1990; Pavlath et al., 1989).

Flow cytometry using rodent-specific mAbs indicated a limited number of integrin  $\alpha$  chains on the two myoblast cell lines (Fig. 1). For both MM14 and C2C12 cells, we found no detectable  $\alpha 1$  or  $\alpha 2$  integrins, but significant levels of  $\alpha 5$  and  $\alpha 6$  were present. For analysis of  $\alpha 7$  expression, several anti- $\alpha 7$  extracellular domain-specific mAbs were generated. The approach was to use a syngeneic system of rat-2 cells that were transfected with the mouse  $\alpha 7$  cDNA. These transfectants, when used as immunogen in syngeneic Fisher rats, generated a specific immune response and resulted in at least six different anti- $\alpha 7$  mAb-producing hybridomas, several of which (CY4, CY8) exhibited potent function-blocking activity. For flow cytometry, the CY8 anti- $\alpha 7$  mAb was used (Fig. 1) and the result showed that both MM14 and C2C12 myoblasts express high levels of  $\alpha 7$ . For both cell lines,  $\alpha 7$  appeared to be the predominant  $\alpha$  chain integrin.

Integrin expression by the MM14 and C2C12 myoblasts was also analyzed using immunoprecipitation of surface-biotinylated cells (Fig. 2A and B). While the efficiency of biotinylation between the integrin chains may vary, significant levels of  $\alpha 1$ ,  $\alpha 2$ , or  $\alpha 4$  were not detected in the immunoprecipitates from either myoblast cell line. Consistent with the capacity of MM14 and C2C12 cells to adhere to fibronectin (Goodman et al., 1989 and unpublished results), moderate levels of  $\alpha 5\beta 1$  were present (Fig. 2A and B, lane 6). The immunoprecipitation pattern confirmed the high expression of  $\alpha 7$  which migrates with its characteristic  $M_r$  35,000 and  $M_r$  70,000 cleavage products after reduction (Fig. 2A and B, lane 8). In addition, significant  $\alpha 6$ -immunoreactive material was immunoprecipitated from both cell lines. While the C2C12 cells expressed the  $\alpha 6\beta 1$  heterodimer, the MM14 cells displayed a unique  $\alpha 6$ -positive pattern with a  $M_r$  200,000 band that was not present in the C2C12 myoblast immunoprecipitates (Fig. 2A and B, lane 7). Additional experiments established that this band represented the  $\beta 4$  subunit that paired with the  $\alpha 6$  chain (Fig. 2C). Both anti- $\alpha 6$  (GoH3) and anti- $\beta 4$  (346-11A) mAbs immunoprecipitated the same complex of

surface-biotinylated MM14 cell lysates (Fig. 2C, lanes 1, 2, 4, and 5). Furthermore, after the lysate was exhaustively pre-cleared with anti- $\beta 1$  pAb, the unique  $\beta 4$  band still could be immunoprecipitated with GoH3 mAb (Fig. 2C, lanes 3 and 6). The abundance of the  $\alpha 6\beta 4$  integrin suggested that only a small fraction of  $\alpha 6$  subunit is complexed with  $\beta 1$  in the MM14 cells. In contrast,  $\beta 4$ -reactive material was never detected in the C2C12 myoblasts.

Since no extracellular-domain-specific mAb for mouse  $\alpha 3$  is available, we estimated  $\alpha 3$  integrin levels by immunoprecipitation with pAb specific for the  $\alpha 3$  cytoplasmic domain. Only moderate amounts of  $\alpha 3$  were present in either cell type (Fig. 2A and B, lane 4). Therefore, C2C12 and MM14 myoblasts have a similar limited repertoire of integrins on their cell surface, with  $\alpha 7$  as the predominant receptor.

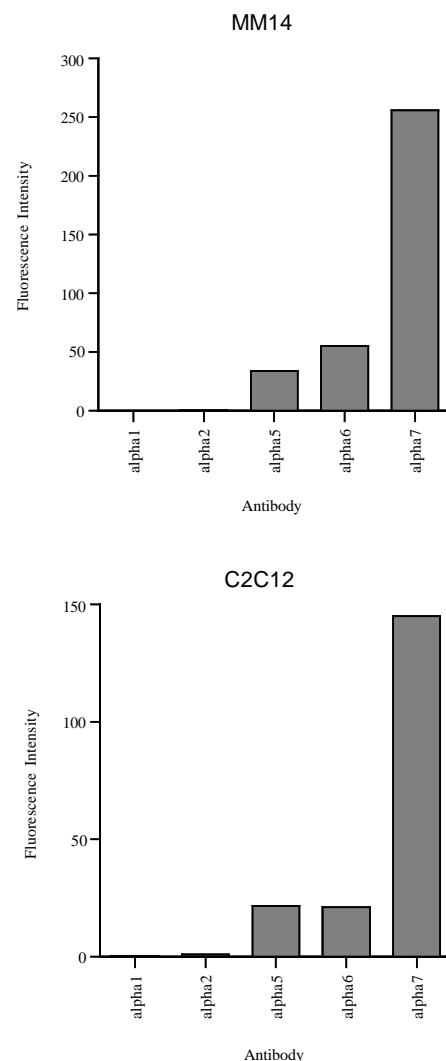

**Fig. 1.** Cell surface expression of integrin subunits on MM14 and C2C12 myoblasts. Flow cytometry analysis of the MM14 and C2C12 myoblasts was performed with optimal concentrations of mAbs Ha1/29 (anti- $\alpha 1$ ), Ha31/8 (anti- $\alpha 2$ ), IIA1 (anti- $\alpha 5$ ), GoH3 (anti- $\alpha 6$ ) and CY8 (anti- $\alpha 7$ ), followed by incubation with FITC-labeled goat anti-hamster (for Ha1/29 and Ha31/8) or goat anti-rat (for IIA1, GoH3 and CY8) IgG. Values from controls of secondary antibody alone were subtracted to give the mean fluorescence intensity.

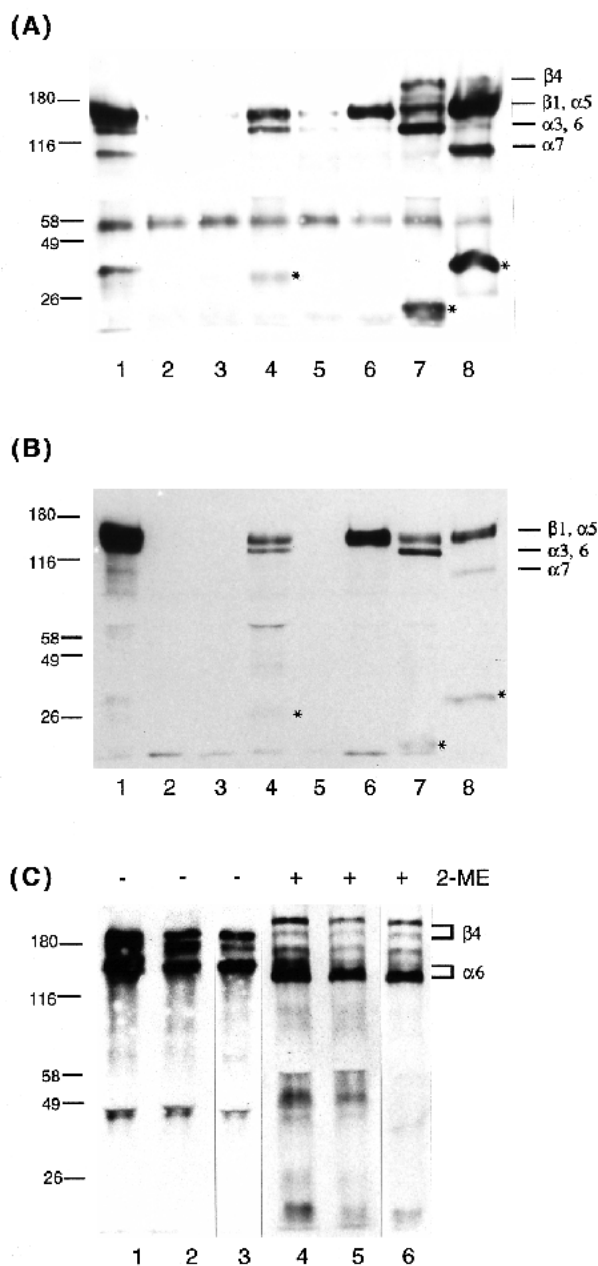

**Fig. 2.** Association of  $\alpha 6$  integrin with  $\beta 4$  subunits in MM14 myoblasts. (A) Surface-biotinylated MM14 myoblast or (B) C2C12 myoblast lysates were immunoprecipitated with rabbit pAb anti- $\beta 1$  (anti- $\beta 1$ , lane 1), mAb Ha31/8 (anti- $\alpha 1$ , lane 2), mAb Ha1/29 (anti- $\alpha 2$ , lane 3), pAb anti- $\alpha 3$  (lane 4), mAb R1-2 (anti- $\alpha 4$ , lane 5), IIA1 (anti- $\alpha 5$ , lane 6), GoH3 (anti- $\alpha 6$ , lane 7) or CY8 (anti- $\alpha 7$ , lane 8). (C) Surface-biotinylated MM14 myoblast lysates were directly immunoprecipitated with anti- $\alpha 6$  mAb GoH3 (lanes 1 and 4) or anti- $\beta 4$  mAb 346-11A (lanes 2 and 5) or sequentially immunoprecipitated with rabbit pAb against  $\beta 1$  followed by anti- $\alpha 6$  mAb GoH3 (lanes 3 and 6). Immunoprecipitates were resolved by 7.5% SDS-PAGE under reducing (2-ME +) for A and B and under either non-reducing (2-ME -) or reducing (2-ME +) conditions for C and transferred to Immobilon-P membranes. Proteins were visualized by incubation with streptavidin conjugated to horseradish peroxidase and then detected by ECL. Size standards are shown at left (kDa). Cleavage products of  $\alpha 3$ ,  $\alpha 6$ , and  $\alpha 7$  subunits upon reduction are marked (\*).

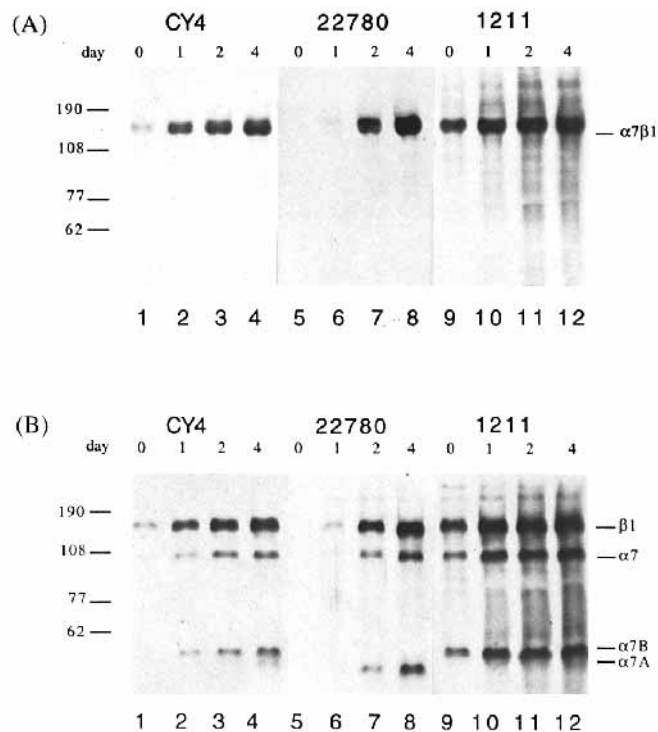

**Fig. 3.** Immunoprecipitation analysis of  $\alpha 7$  cytoplasmic domain isoforms on C2C12 myoblasts during differentiation to myotubes. C2C12 cells were incubated in differentiation medium for 0 (lanes 1, 5, 9), 1 (lanes 2, 6, 10), 2 (lanes 3, 7, 11), and 4 days (lanes 4, 8, 12). Substantial amounts of myotubes were formed after 3 days in differentiation medium. Surface-biotinylated lysates were immunoprecipitated with either anti- $\alpha 7$  extracellular domain mAb CY4 (lanes 1-4), anti- $\alpha 7A$  cytoplasmic domain pAb 22780 (lanes 5-8), or anti- $\alpha 7B$  cytoplasmic domain pAb 1211 (lanes 9-12). Immunoprecipitates were resolved by 7.5% SDS-PAGE under both non-reducing (A) and reducing (B) conditions and transferred to Immobilon-P membranes. Proteins were visualized by incubation with streptavidin conjugated to horseradish peroxidase and then detected by ECL. Size standards (kDa) are shown on the left and the migration positions of the integrin chains are shown on the right. Note that following reduction, the  $\alpha 7$  subunit is cleaved into its heavy and light chain fragments.

### Expression of $\alpha 7A$ and $\alpha 7B$ integrin isoforms is differentiation-dependent

RT-PCR analysis previously suggested that alternative mRNA splicing occurs at the cytoplasmic domain of  $\alpha 7$  integrin in skeletal muscle (Collo et al., 1993; Song et al., 1993; Ziober et al., 1993). We analyzed the levels of  $\alpha 7$  and its A and B alternatively spliced cytoplasmic isoforms that are expressed at the surface of C2C12 cells at different stages of their differentiation from myoblasts to myotubes, using surface biotinylation and immunoprecipitation with specific pAb and mAb (Fig. 3A,B). A third potential alternatively spliced isoform,  $\alpha 7C$ , has been identified (Song et al., 1993). However, this highly truncated cytoplasmic isoform appears to be expressed at relatively low levels in myoblasts (Song et al., 1993) and was not evaluated in the current study. Immunoprecipitation of cell lysates with CY4, a mAb generated against the extracellular domain of  $\alpha 7$ , yielded the  $\alpha 7$  subunit, expression of which increased greatly following myoblast differentiation to

**Fig. 4.** Inhibition of myoblast adhesion on laminin 1 by function-perturbing mAbs to  $\alpha 7$ . MM14 cells (A) or C2C12 cells (B) were pre-incubated with mAb CY8 (anti- $\alpha 7$ ) for 30 minutes on ice, added to laminin-1-coated plates in triplicate, and allowed to adhere to the substrate at 37°C for 50 minutes as described in Materials and Methods. Two different concentrations of CY8 (1  $\mu\text{g/ml}$  and 10  $\mu\text{g/ml}$ ) showed the same degree of inhibition. (C) Adhesion of C2C12 cells on laminin 1 (10  $\mu\text{g/ml}$ ) was assayed with mAb GoH3 (anti- $\alpha 6$ ), CY8 (anti- $\alpha 7$ ), or Ha2/11 (anti- $\beta 1$ ). Data are presented as a percentage of the total cells added to each well in A and B; maximum adhesion in the control wells in C was taken as 100% adhesion; bars show s.d.

myotubes; under non-reducing conditions the  $\beta 1$  subunit partner comigrated with the  $\alpha 7$  subunit (Fig. 3A, lanes 1-4) (Kramer et al., 1989, 1991). Following reduction, the  $\beta 1$  subunit exhibited decreased mobility while the  $\alpha 7$  subunit was cleaved to yield a  $M_r$  100,000 fragment and an  $\sim 30,000$  fragment containing the cytoplasmic tail (Fig. 3B, lanes 1-4); the light chain was frequently resolved into doublet bands of  $M_r$  35,000 and 25,000. Immunoprecipitation showed that the 35,000 fragment was recognized by rabbit pAb 1211 generated to  $\alpha 7B$  (Fig. 3B, lanes 9-12) and the 25,000 fragment was recognized by pAb 22780 generated to  $\alpha 7A$  (Fig. 3B, lanes 5-8). In C2C12 myoblasts, the  $\alpha 7A$  variant was not detectable whereas  $\alpha 7B$  was strongly expressed (Fig. 3A,B, lanes 5 and 9). However, after induction of differentiation to myotubes, levels of both  $\alpha 7B$  and  $\alpha 7A$  were markedly elevated. Monoclonal Ab 3F4 was also prepared against the  $\alpha 7B$  cytoplasmic region and verified the expression pattern (data not shown). Thus, the increase in the  $\alpha 7$  subunit at the cell surface following the conversion of proliferating myoblasts to non-proliferative myotubes was correlated with the elevation of  $\alpha 7B$  and the induction of  $\alpha 7A$  expression.

### Myoblast $\alpha 7$ integrin mediates adhesion and migration on laminin 1

Since both MM14 and C2C12 myoblast cell lines expressed high levels of  $\alpha 7$ , we tested their capacity to attach and migrate on laminin 1 substrates in the presence of different concentrations of function-perturbing mAb CY8. The CY8 mAb to  $\alpha 7$  inhibited up to 90% of MM14 cell adherence to a range of coating concentrations of laminin 1 (3 to 30  $\mu\text{g/ml}$ ) (Fig. 4A). Adhesion of C2C12 myoblasts to laminin 1 was also blocked but to a lesser extent, especially at high ligand-coating concentrations (Fig. 4B). This inhibition of adhesion of C2C12 cells varied but reached 60% at a laminin coating of 10  $\mu\text{g/ml}$ . At 30  $\mu\text{g/ml}$  of coating, the inhibitory effect of mAb CY8 decreased to  $\sim 45\%$ . Therefore, although C2C12 and MM14 myoblasts have a similar repertoire of laminin-binding integrins on their cell surfaces, they differ somewhat in their dependency on  $\alpha 7$  for adherence to laminin 1.

The resistance of C2C12 cells to function-blocking mAb to  $\alpha 7$  suggested that the  $\alpha 6$  integrin could be involved in binding to laminin 1. Though the percentage of blocking by GoH3 or CY8 varied slightly between experiments, slight to no inhibition by GoH3 and substantial inhibition by  $\alpha 7$  were always noticed. The combination of GoH3 and CY8 consistently blocked adhesion completely as well as Ha2/11 (Fig. 4C). Interestingly,  $\alpha 6$  integrin, which was also detected by FACS on MM14 cells at similar levels, did not appear to have an

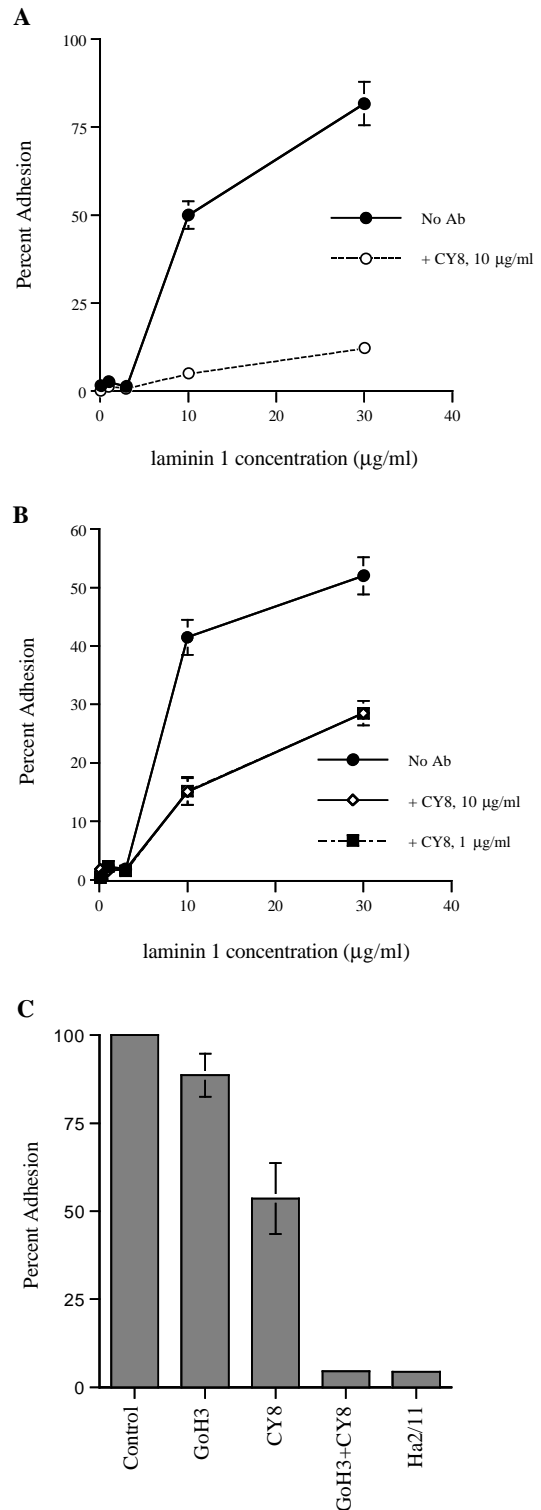

important role in binding to laminin. This may be a consequence of its pairing to  $\beta 4$  in the MM14 cells. This suggested that in the case of MM14 myoblasts,  $\alpha 7\beta 1$  is the dominant receptor and that  $\alpha 6\beta 4$  is not effective in mediating adhesion to laminin 1. Although  $\alpha 7\beta 1$  has been shown by affinity chromatography on fibronectin-Sepharose columns to bind fibronectin (Gu et al., 1994), in our study function-perturbing

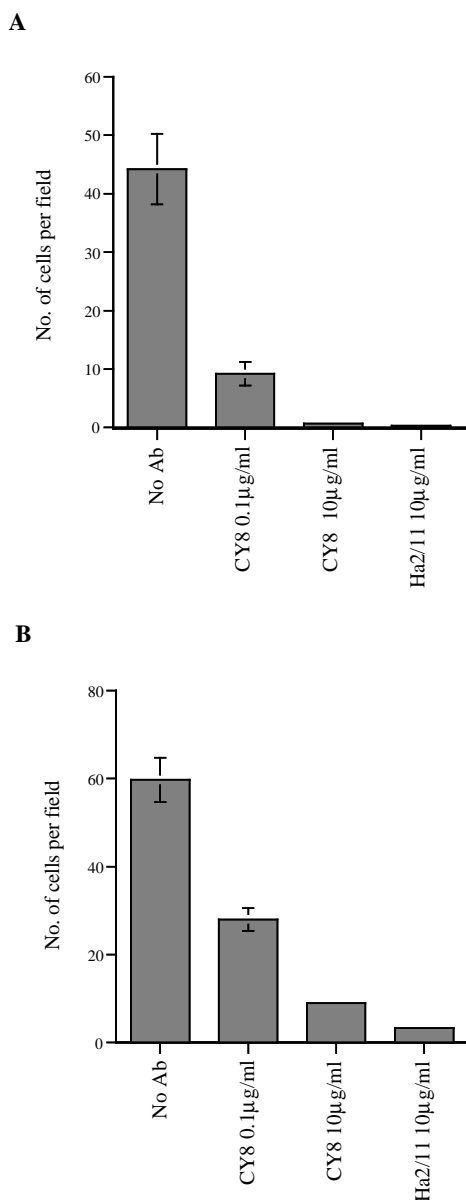

**Fig. 5.** Inhibition of myoblast migration on laminin 1 by function-perturbing mAbs to  $\alpha 7$ . (A) Motility of MM14 myoblasts on laminin 1 was measured in the presence of function-perturbing mAbs in a modified Boyden chamber assay. MM14 cells were resuspended in F10 medium containing 0.1% BSA;  $2 \times 10^4$  cells were added to the upper chamber and incubated for 5 hours. Some samples were pre-incubated with CY8 (0.1  $\mu\text{g/ml}$  or 10  $\mu\text{g/ml}$ ) or Ha2/11 (anti- $\beta 1$ , 10  $\mu\text{g/ml}$ ). (B) C2C12 cells in DMEM H-21 containing 0.1% BSA were tested in the motility assay but incubated for 3.5 hours. Motility was quantified by counting the number of cells that migrated to the undersides of the membranes. The results are averages of at least nine random  $\times 400$  microscopic fields; bars show s.d.

mAb to  $\alpha 7$  did not block C2C12 myoblast adhesion to fibronectin substrates, which appears at least partially to depend on the  $\alpha 5\beta 1$  receptor (data not shown) which is expressed at moderate levels (Figs 1 and 2).

Migration on laminin 1 substrates was effectively blocked in a dose-response manner for both MM14 and C2C12 myoblasts

with anti- $\alpha 7$  mAb (CY8) in modified Boyden chamber assays (Fig. 5A,B). CY8 mAb at 10  $\mu\text{g/ml}$  blocked MM14 cell migration by nearly 100% and C2C12 cell migration by more than 85%. This inhibitory effect was similar to that generated by the anti-mouse  $\beta 1$  function-perturbing mAb (Ha2/11), and to that produced by a second blocking mAb to mouse  $\alpha 7$  (CY4) (data not shown). Thus, although the C2C12 myoblasts can use  $\alpha 6\beta 1$  to adhere to laminin 1, migration is much more dependent on the  $\alpha 7$  integrin.

### Myoblast $\alpha 7$ binds differentially to specific laminin isoforms

We next tested the effect of function-perturbing mAb to  $\alpha 7$  on adherence of MM14 cells to the available laminin isoform preparations. Monoclonal Ab to  $\alpha 7$  (CY8) inhibited 90% of MM14 cell adherence to laminin 1 and 45% of adherence to laminin 2/4, but failed to block the modest adhesion of MM14 cells to laminin 5 (Fig. 6A). In a more detailed study of MM14 myoblast adherence to laminin 2/4, the substantial inhibition of adhesion by  $\alpha 7$  mAb was not duplicated by  $\alpha 6$  mAb (Fig. 6B), but was sensitive to blocking  $\beta 1$  mAb (Ha2/11). Therefore, on MM14 myoblasts,  $\alpha 7$  is required for mediating binding to laminin 1 and laminin 2/4 but not to laminin 5. Adhesion to laminin 5, although weak, may be mediated by  $\alpha 3\beta 1$  or  $\alpha 6\beta 4$  integrin, which is expressed at low levels on these cells. In additional experiments, neither mAb GoH3 (anti- $\alpha 6$ ) nor mAb CY8 (anti- $\alpha 7$ ) could block MM14 myoblast adhesion to laminin 5. The combination of these two mAbs produced a slight (<10%) inhibition whereas mAb Ha2/11 (anti- $\beta 1$ ) substantially blocked adhesion to laminin 5 (data not shown). The results suggest that the  $\alpha 7$  on myoblasts is not an effective receptor for epithelium-specific laminin 5 but binds with high efficiency to laminin 1 and laminin 2/4. It is noteworthy that although the adhesion of C2C12 to laminin 1 could be completely blocked by the combination of  $\alpha 6$  and  $\alpha 7$  mAbs (Fig. 4C), the adhesion to laminin 2/4 was only partially blocked by this combination (data not shown). Interestingly, the adhesion was not completely dependent on  $\beta 1$  integrins. We next examined the motility of MM14 cells on laminin 2/4 substrates. Even though anti- $\alpha 7$  mAb only partially blocked adhesion in short term assays on laminin 2/4 (Fig. 6B), the mAb was very effective in blocking motility on this ligand (Fig. 6C). As expected, anti- $\beta 1$  mAb effectively inhibited MM14 motility on laminin 2/4.

### Functional analysis of $\alpha 5/\alpha 7$ cytoplasmic domain chimeras

The differentiation-dependent alternative splicing of the  $\alpha 7$  integrin (Fig. 3) suggests that the  $\alpha 7A$  and  $7B$  cytoplasmic regions may regulate integrin-dependent activities, as has been suggested for the closely related  $\alpha 6A$  and  $6B$  integrin variants (Shaw and Mercurio, 1994). We tested potential functional differences between  $\alpha 7A$  and  $\alpha 7B$  isoforms in a chimera context by transfecting  $\alpha 5$  subunit chimeric molecules into  $\alpha 5$ -deficient CHO B2 cells. CHO B2 cells were transfected with expression vectors containing (i) wild-type human  $\alpha 5$  cDNA ( $\alpha 5/\alpha 5$ ), (ii) extracellular human  $\alpha 5$ /cytoplasmic mouse  $\alpha 7A$  cDNA ( $\alpha 5/7A$ ), or (iii) extracellular human  $\alpha 5$ /cytoplasmic mouse  $\alpha 7B$  cDNA ( $\alpha 5/7B$ ) (Fig. 7). Stable transfectants were selected by 'panning' with immobilized anti- $\alpha 5$  mAb (6F4) and by sorting with the same mAb. The mean expression levels

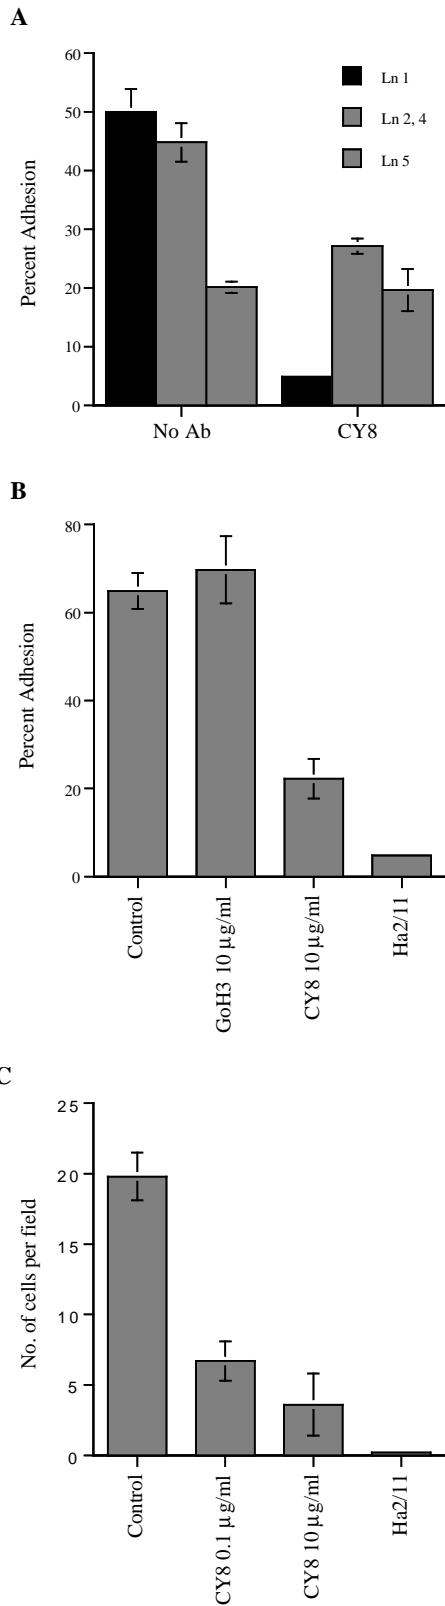

**Fig. 6.** (A) Adhesion of MM14 myoblasts to laminin isoforms. Dependency of  $\alpha 7$  integrin on MM14 cell adhesion to laminin 1 (10  $\mu\text{g/ml}$ ), laminin 2/4 (30  $\mu\text{g/ml}$ ) or laminin 5 (3  $\mu\text{g/ml}$ ) was assessed at the coating concentration giving 20-50% cell adhesion. Monoclonal Ab CY8 (anti- $\alpha 7$ ) at 10  $\mu\text{g/ml}$  was able to inhibit adherence to laminin 1 and laminin 2/4, but had no effect on adherence to laminin 5. Data are presented as a percentage of the total cells added to each well. (B) Adhesion of MM14 cells to laminin 2/4 (10  $\mu\text{g/ml}$ ) was dependent on  $\alpha 7\beta 1$  integrin but not on  $\alpha 6$ . (C) Migration of MM14 myoblasts on laminin 2/4 was assayed with function-perturbing mAbs and was almost completely blocked with anti- $\alpha 7$  mAb (CY8) as well as anti- $\beta 1$  mAb (Ha2/11). Assays were performed as described in Fig. 5 (A) using human placental merosin at the coating concentration of 20  $\mu\text{g/ml}$ . Bars show s.d.

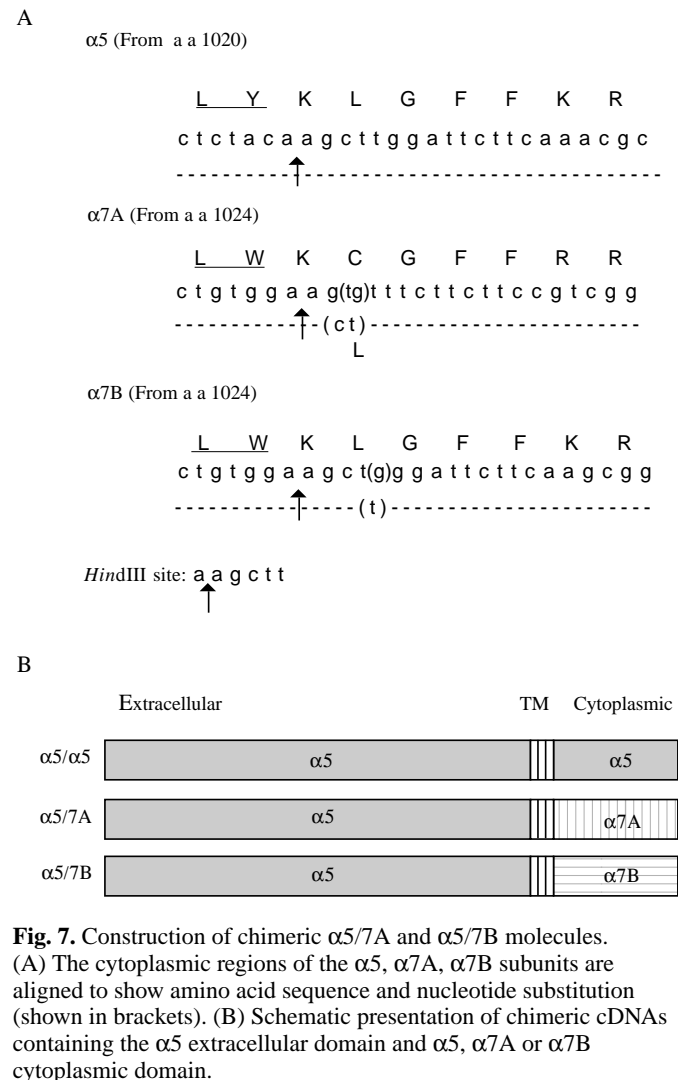

of the transfectant cell lines were compared by FACS (Fig. 8A) using anti-human  $\alpha 5$  mAb (B2G2). Similar expression levels were obtained for the wild-type human  $\alpha 5$  and the  $\alpha 5/7A$  and  $\alpha 5/7B$  chimeras.

We then tested the transfectants for their ability to adhere to fibronectin substrates. Both the  $\alpha 5/7A$  and the  $\alpha 5/7B$  transfectants adhered well to fibronectin, as efficiently as the wild-type human  $\alpha 5$  transfectants (Fig. 8B). Initial binding was detected at coating concentrations of  $\geq 1$   $\mu\text{g/ml}$  fibronectin, while maximum adhesion of cells to fibronectin was obtained at a coating concentration of 30  $\mu\text{g/ml}$ .



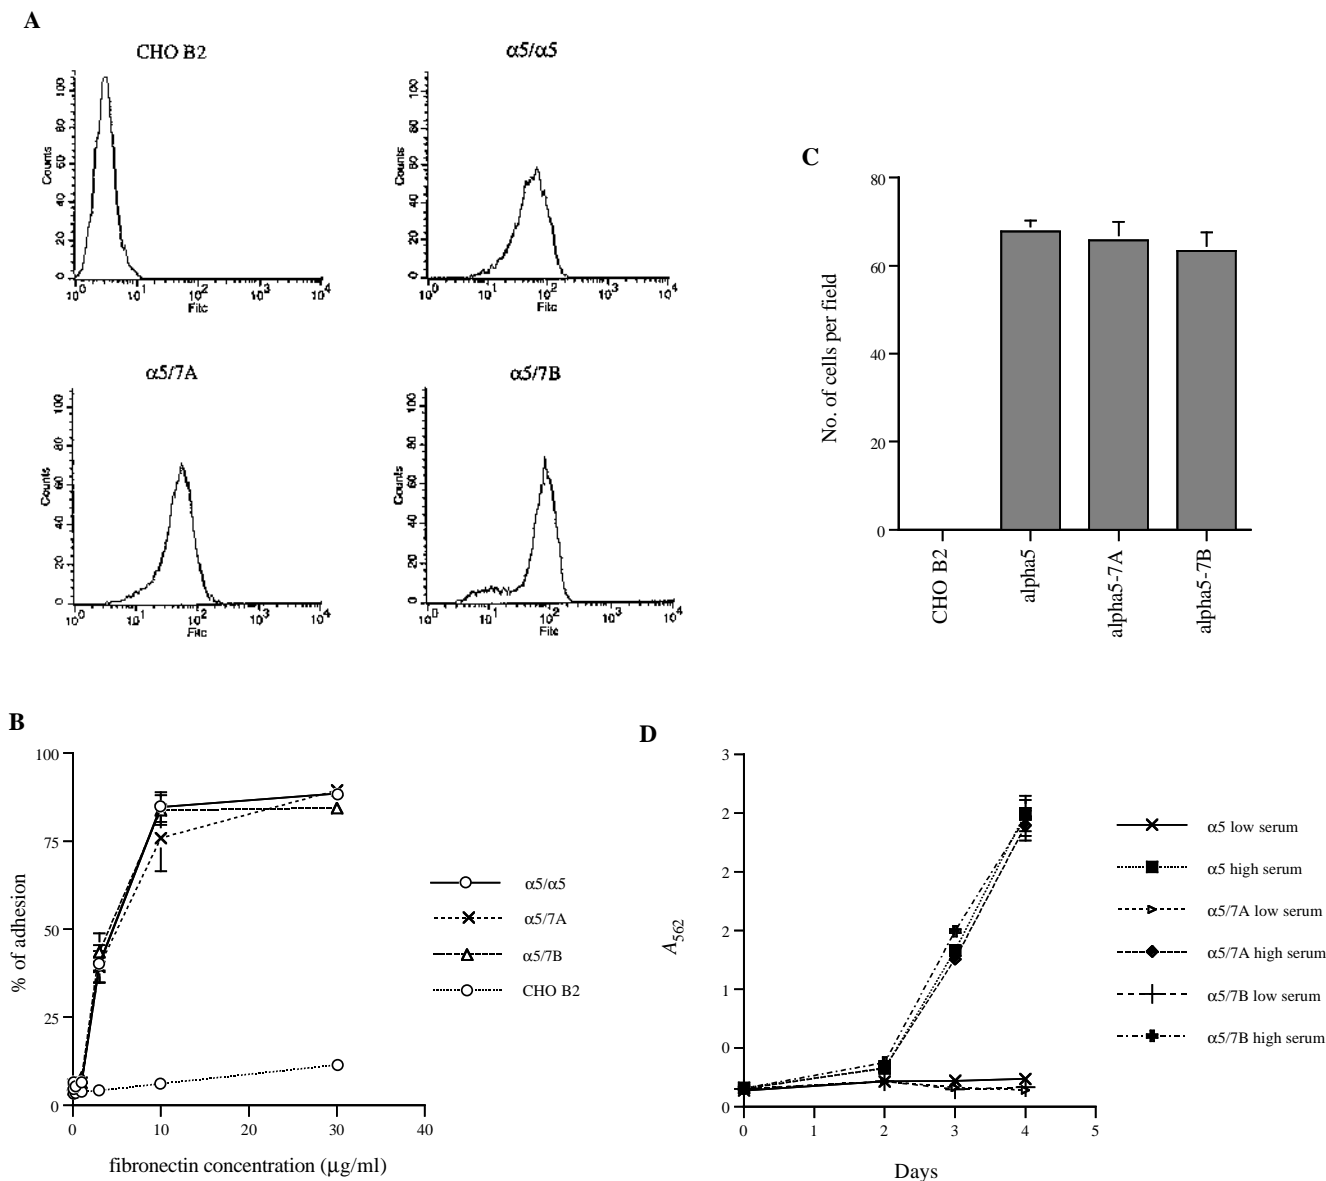

**Fig. 8.** Characterization of wild-type  $\alpha 5$  and chimeric  $\alpha 5/7A$  and  $\alpha 5/7B$  transfectants. (A) Surface expression of wild-type  $\alpha 5$ , chimeric  $\alpha 5/7A$  and  $\alpha 5/7B$  in CHO B2 transfectants.  $\alpha 5$ -deficient CHO B2 cells were transfected with cDNA encoding human  $\alpha 5$  or chimeric human  $\alpha 5$ /mouse  $\alpha 7A$  or human  $\alpha 5$ /mouse  $\alpha 7B$  constructs as described in Materials and Methods. Transfectants were enriched for expression of the  $\alpha 5$  extracellular domain by panning and FACS using 6F4, a mAb specific for the human  $\alpha 5$  integrin subunit. The surface expression was analyzed by flow cytometry using B2G2 (anti-human  $\alpha 5$ ). (B) Adhesion of transfectants to fibronectin-coated substrates. Cells ( $2 \times 10^4$ ) were resuspended in medium containing 0.1% BSA and added to plates coated with fibronectin at different concentrations. Adherence of cells in 1% BSA-coated wells was treated as background binding and subtracted. Data are presented as percentage of the total cells added to each well. Values are means and s.d. of the triplicate wells. The parental CHO B2 cells are a negative control for wild-type  $\alpha 5$ ,  $\alpha 5/7A$  and  $\alpha 5/7B$  transfectants. (C) Motility of transfectants on fibronectin. In the modified Boyden chamber assay, filters were coated with fibronectin (10  $\mu\text{g/ml}$ ) as described in Materials and Methods. Cells were added to the upper chamber and incubated for 5 hours. Motility was quantified by counting the number of cells that migrated to the undersides of the membranes. The results are averages of at least 9 random  $\times 400$  microscopic fields. CHO B2 cells are a negative control for wild-type  $\alpha 5$ ,  $\alpha 5/7A$  and  $\alpha 5/7B$  transfectants. (D) Analysis of cell proliferation. Cell growth assays were performed as described in Materials and Methods. Transfectants had similar growth rates under the same conditions. In low-serum conditions, cells grew poorly. In high-serum conditions, cells grew rapidly. Data from low-serum and high-serum with fibronectin coating are shown. Values are means of triplicate wells; bars show s.d.

Using a modified Boyden chamber assay, we examined the contribution of the  $\alpha 7A$  and  $\alpha 7B$  cytoplasmic domains to cellular haptotaxis on fibronectin substrates (Fig. 8C). After 5 hours of incubation, the  $\alpha 5/7A$  and  $\alpha 5/7B$  transfectants

migrated on fibronectin to a similar extent as the wild-type  $\alpha 5$  transfectants. As expected, the parental CHO B2 cells, which lack the  $\alpha 5$  integrin, did not migrate on fibronectin. Therefore, the  $\alpha 7A$  and  $\alpha 7B$  cytoplasmic domains can equally support the

$\alpha 5$  extracellular domain in inducing CHO cells to adhere, spread and migrate on fibronectin.

Previous studies have shown that the  $\alpha 5\beta 1$  integrin plays a role in the control of CHO cell growth (Giancotti and Ruoslahti, 1990; Schreiner et al., 1991). We evaluated whether the 7A or B transfectants could replace the  $\alpha 5$  cytoplasmic domain in mediating this function. Proliferation of transfectants under high (10%) or low (0.2%) serum conditions with or without a fibronectin substrate was measured at different times after plating. Analysis of growth rate indicated that in the high-serum conditions all transfectants grew at a similar rate after an initial log period following cell plating (Fig. 8D). Low-serum conditions failed to support growth of any of the cell lines. No differences in growth rate were detected between the  $\alpha 5$ ,  $\alpha 7A$  or  $\alpha 7B$  cytoplasmic tails. Finally, because  $\alpha 5\beta 1$  integrin functions in fibronectin matrix assembly, we tested the  $\alpha 5/7A$  and  $\alpha 5/7B$  CHO transfectants for ability to support the functional role of  $\alpha 5$  in the assembly of a fibronectin matrix. The results indicated that cells expressing either of the chimeric molecules were able to assemble exogenous fibronectin molecules into a complex network-type matrix, like the cells expressing the  $\alpha 5$  wild-type receptor (data not shown). In aggregate, then, these data suggest that  $\alpha 7A$  and  $\alpha 7B$  cytoplasmic domains are functionally similar with regard to a number of integrin-dependent activities.

## DISCUSSION

Laminin has been shown to enhance proliferation, migration and differentiation of myoblasts (Goodman et al., 1989; Ocalan et al., 1988; von der Mark and Ocalan, 1989). Using function-perturbing antibodies, we show for the first time that  $\alpha 7$  is the major receptor mediating skeletal myoblast adhesion and migration on laminins 1 and 2/4. Recently Echtermeyer et al. (1996) showed that transfection of human 293 carcinoma cells with cDNA to  $\alpha 7$  integrin increased the motility but apparently not adhesion to laminin 1. This result would suggest that  $\alpha 7$  may selectively induce cell motility. However, in another study, MCF-7 carcinoma cells transfected with  $\alpha 7$  promoted both adhesion and motility on laminins (Yao et al., 1996).

In the present study we also examined the ligand specificity of the  $\alpha 7$  receptor in myoblasts, using available laminin isoforms. In MM14 myoblasts, both adhesion and migration to preparations of laminin 1 and to human placental laminins (a mixture of laminin 2 and 4) were inhibited by function-perturbing antibody to  $\alpha 7\beta 1$ . However, the binding to laminin 5 was not affected by the mAb to  $\alpha 7$ . It is not possible to attribute the binding of  $\alpha 7\beta 1$  to laminin 2 or laminin 4 in this mixed preparation. A more detailed analysis of the ligand specificity of the  $\alpha 7$  receptor awaits the availability of purified preparations of different members of the laminin superfamily, especially laminin 2 (merosin), laminin 3 (s-laminin) and laminin 4 (s-merosin) which are present in skeletal muscle basement membranes (Engvall et al., 1990; Sanes et al., 1990). Although the adhesion of MM14 cells to laminin 1 and laminin 2/4 were perturbed by mAb to  $\alpha 7$ , the binding to laminin 5 was not altered either by the mAb to  $\alpha 7$  or the mAb to  $\alpha 6$  (data not shown). It has been shown previously that  $\alpha 6\beta 4$  receptor can be resistant to function-perturbing mAb GoH3 (Sonnenberg et al., 1993). In the case of MM14 myoblast adhesion to laminin

5, it is likely that  $\alpha 3\beta 1$  and/or  $\alpha 6\beta 4$  integrins are involved since these receptors have been shown to bind to the laminin 5 isoform (Delwel and Sonnenberg, 1995).

Our finding that blocking mAb to  $\alpha 7$  only partially inhibited MM14 cell adhesion to a mixture of laminin 2 and 4 indicates that additional laminin-binding receptors besides  $\alpha 7$  are involved in myoblast adhesion to these laminin isoforms. There may be redundant mechanisms for myoblasts to bind laminin 2 and laminin 4, which are localized at the basement membrane surrounding individual muscle fibers and at myotendinous junctions, respectively. Of the  $\beta 1$  integrins expressed in cultured myoblasts, both  $\alpha 3$  and  $\alpha 6$  could also contribute to the binding of laminin 2/4 (Delwel et al., 1994; Spinardi et al., 1995). In previous studies, low levels of  $\alpha 3$  and  $\alpha 6$  integrins were detected on surface-iodinated C2C12 and G7 murine myoblasts (von der Mark et al., 1991). However, using surface-biotinylated cells we found significant amounts of  $\alpha 3$  and  $\alpha 6$  integrins in both MM14 and C2C12 myoblasts. These differences may reflect the experimental protocols used or variations in the cell lines.

It is likely that during early developmental stages, both  $\alpha 6$  and  $\alpha 7$  integrins may mediate interactions with laminin and promote migration and differentiation; in adult muscle,  $\alpha 6$  expression is completely down-regulated while  $\alpha 7$  shows increased expression (Ziober and Kramer, 1996) and localizes to the myotendinous and neuromuscular junctions. However, the detection of  $\alpha 6\beta 4$  on MM14 myoblasts is unexpected since  $\alpha 6\beta 4$  expression usually is restricted to epithelia (Natali et al., 1992). Whether  $\alpha 6\beta 4$  is expressed at specific time points during muscle development awaits further study. On the other hand, myoblasts do express additional non-integrin laminin-binding receptors, including  $\alpha$ -dystroglycan (Ervasti and Campbell, 1993; Klietsch et al., 1993) and 5' nucleotidase (Mehul et al., 1990, 1992), which can also contribute to interactions with basement membrane. Eventually, it will be important to define the individual and the cooperative contributions of each other potential laminin-binding receptor to adhesion and migration on specific laminin isoforms.

The dynamic interaction between myoblasts and specific laminin isoforms is important for both muscle development and muscle regeneration. Recently Vachon et al. (1996) showed that merosin is specifically required for myotube stability and survival. During development, there are several waves of myogenic precursor migration from myotome to the sites where muscle eventually forms (Van Swearingen and Lance-Jones, 1995). In mature muscle, satellite cells are responsible for repair of injured tissue (Schultz and McCormick, 1994). It has been shown that  $\alpha 7$  integrin is expressed not on primary but on secondary myoblasts, and also on all terminally differentiated myotubes (George-Weinstein et al., 1993).  $\alpha 7$  integrin is also highly expressed in all the cell lines derived from satellite cells of adult muscle (von der Mark et al., 1991, and the current results). Following muscle injury, degenerating cells are removed by scavenger cells but the basement membrane remains largely intact (Alameddine et al., 1991). Satellite cells can pass through the residual muscle basement membrane, undergo extensive migration, proliferate, differentiate, and be incorporated within the preexisting myofibers (Hughes and Blau, 1990). Therefore, cell motility on extracellular matrix is required in both normal muscle development and the repair following injury.

Upon interacting with extracellular ligands, different cytoplasmic domains of  $\alpha 7$  may trigger differential downstream events. We found that  $\alpha 7$  integrin condensed into vinculin-positive focal contacts when myoblasts were plated on laminin 1 substrates (not shown). Focal adhesion sites have been shown to contain not only cytoskeletal proteins as structural components but also other signaling complexes. It is possible that upon binding the ligand,  $\alpha 7$  integrin orchestrates downstream signaling events that lead eventually to specific proliferative, motile, and differentiated phenotypes on laminin.

Several  $\alpha$  subunits of integrins have alternative RNA splicing forms, including  $\alpha 3$ ,  $\alpha 6$  and  $\alpha 7$  (Collo et al., 1993; Cooper et al., 1991; Hogervorst et al., 1991, 1993a; Song et al., 1993; Tamura et al., 1990; Ziober et al., 1993). However, differential functions of the  $\alpha$  chain-cytoplasmic isoforms have not been well delineated. Studies searching for functional differences between  $\alpha 6A$  and  $\alpha 6B$  have obtained conflicting results (Delwel et al., 1993; Hogervorst et al., 1993a,b; O'Toole et al., 1994; Shaw et al., 1993; Shaw and Mercurio, 1994). In the current chimeric construct experiments with CHO cells, we found that  $\alpha 7A$  and  $\alpha 7B$  exhibited similar adhesive activities. The functional studies we chose, however, might not detect all potential differences. It is also possible that  $\alpha 7A/B$  integrins will show differential functions only in the endogenous muscle microenvironment. Skeletal muscle cells have uniquely organized cytoskeletal-sarcolemmal associations that function to transfer force from the contractile apparatus to the extracellular anchorage. The recent identification of the differentiation-dependent switching in  $\beta 1$  integrin cytoplasmic tail isoforms also argues that  $\alpha 7$  cytoplasmic variant function may require a skeletal muscle environment. Following myoblast differentiation to myotubes,  $\beta 1D$  completely replaces the  $\beta 1A$  isoform (van der Flier et al., 1995; Zhidkova et al., 1995) and pairs with  $\alpha 7$  subunits. It is possible that differential functions of  $\alpha 7$  cytoplasmic domain isoforms will only be detected when  $\alpha 7$  is associated with  $\beta 1D$ .

In summary, we show for the first time that  $\alpha 7\beta 1$ , the major laminin receptor on myoblasts, specifically mediates both cell adhesion and migration on laminin 1. In addition we have demonstrated that  $\alpha 7$  in myoblast can bind to a mixture of laminin 2 and 4, but not to laminin 5. These results strongly support the role of the  $\alpha 7$  receptor in mediating interactions with specific laminin isoforms not only in mature muscle fibers but also during the recruitment and expansion of resident satellite myoblasts during muscle regeneration.

We thank Dr Caroline Damsky for critical reading of the manuscript and helpful discussions and Dr Robert Burgeson for the generous gift of laminin 5. This work was supported by NIH grants R01 CA 33834, R01 DE 10306 and DE 10564 to Dr Randall Kramer. Ann Sutherland was supported by P01 HD 26732 to Dr Caroline Damsky.

## REFERENCES

- Alameddine, H. S., Hantai, D., Dehaupas, M. and Fardeau, M. (1991). Role of persisting basement membrane in the reorganization of myofibres originating from myogenic cell grafts in the rat. *Neuromusc. Disord.* **1**, 143-152.
- Bauer, J. S., Varner, J., Schreiner, C., Kornberg, L., Nicholas, R. and Juliano, R. L. (1993). Functional role of the cytoplasmic domain of the integrin alpha 5 subunit. *J. Cell Biol.* **122**, 209-221.

- Blau, H. M. and Hughes, S. M. (1990). Cell lineage in vertebrate development. *Curr. Opin. Cell Biol.* **2**, 981-985.
- Bronner-Fraser, M., Artinger, M., Muschler, J. and Horwitz, A. F. (1992). Developmentally regulated expression of alpha 6 integrin in avian embryos. *Development* **115**, 197-211.
- Campbell, J. S., Wenderoth, M. P., Hauschka, S. D. and Krebs, E. G. (1995). Differential activation of mitogen-activated protein kinase in response to basic fibroblast growth factor in skeletal muscle cells. *Proc. Nat. Acad. Sci. USA* **92**, 870-874.
- Chan, B. M., Kassner, P. D., Schiro, J. A., Byers, H. R., Kupper, T. S. and Hemler, M. E. (1992). Distinct cellular functions mediated by different VLA integrin alpha subunit cytoplasmic domains. *Cell* **68**, 1051-1060.
- Collo, G., Starr, L. and Quaranta, V. (1993). A new isoform of the laminin receptor integrin alpha 7 beta 1 is developmentally regulated in skeletal muscle. *J. Biol. Chem.* **268**, 19019-19024.
- Cooper, H. M., Tamura, R. N. and Quaranta, V. (1991). The major laminin receptor of mouse embryonic stem cells is a novel isoform of the alpha 6 beta 1 integrin. *J. Cell Biol.* **115**, 843-850.
- Delwel, G. O., Hogervorst, F., Kuikman, I., Paulsson, M., Timpl, R. and Sonnenberg, A. (1993). Expression and function of the cytoplasmic variants of the integrin alpha 6 subunit in transfected K562 cells. Activation-dependent adhesion and interaction with isoforms of laminin. *J. Biol. Chem.* **268**, 25865-25875.
- Delwel, G. O., de Melker, A. A., Hogervorst, F., Jaspars, L. H., Fles, D. L. A., Kuikman, I., Lindblom, A., Paulsson, M., Timpl, R. and Sonnenberg, A. (1994). Distinct and overlapping ligand specificities of the alpha3A $\beta$ 1 and alpha6A $\beta$ 1 integrins: regulation of laminin isoforms. *Mol. Biol. Cell* **5**, 203-215.
- Delwel, G. O. and Sonnenberg, A. (1995). Laminin Isoforms and their integrin receptors. In *Adhesion Receptors as Therapeutic Targets* (ed. M. A. Horton), pp. 9-26. CRC Press, Boca Raton, FL.
- Duband, J. L., Belkin, A. M., Syfrig, J., Thiery, J. P. and Koteliansky, V. E. (1992). Expression of alpha 1 integrin, a laminin-collagen receptor, during myogenesis and neurogenesis in the avian embryo. *Development* **116**, 585-600.
- Echtermeyer, F., Schober, S., Poschl, E., von der Mark, H. and von der Mark, K. (1996). Specific induction of cell motility on laminin by alpha7 integrin. *J. Biol. Chem.* **271**, 2071-2075.
- Engvall, E., Earwicker, D., Jaaparanta, T., Tauslahti, E. and Sanes, J. R. (1990). Distribution and isolation of four laminin variants; tissue restricted distribution of heterotrimers assembled from five different subunits. *Cell Regul.* **1**, 731-740.
- Enomoto, M. I., Boettiger, D. and Menko, A. S. (1993). Alpha 5 integrin is a critical component of adhesion plaques in myogenesis. *Dev. Biol.* **155**, 180-197.
- Ervasti, J. M. and Campbell, K. P. (1993). A role for the dystrophin-glycoprotein complex as a transmembrane linker between laminin and actin. *J. Cell Biol.* **122**, 809-823.
- Foster, R., Thompson, J. and Kaufman, S. (1987). A laminin substrate promotes myogenesis in rat skeletal muscle cultures: analysis of replication and development using anti-desmin and anti-BrdU monoclonal antibodies. *Dev. Biol.* **122**, 11-20.
- George-Weinstein, M., Foster, R. F., Gerhart, J. V. and Kaufman, S. J. (1993). In vitro and in vivo expression of alpha 7 integrin and desmin define the primary and secondary myogenic lineages. *Dev. Biol.* **156**, 209-229.
- Giancotti, F. G. and Ruoslahti, E. (1990). Elevated levels of the alpha 5 beta 1 fibronectin receptor suppress the transformed phenotype of Chinese hamster ovary cells. *Cell* **60**, 849-859.
- Goodman, S. L., Risse, G. and von der Mark, K. (1989). The E8 subfragment of laminin promotes locomotion of myoblasts over extracellular matrix. *J. Cell Biol.* **109**, 799-809.
- Gu, M., Wang, W., Song, W. K., Cooper, D. N. and Kaufman, S. J. (1994). Selective modulation of the interaction of alpha 7 beta 1 integrin with fibronectin and laminin by L-14 lectin during skeletal muscle differentiation. *J. Cell Sci.* **107**, 175-181.
- Harlow, E. and Lane, D. (1988). *Antibodies: A Laboratory Manual*. Cold Spring Harbor Laboratory Press, New York.
- Hirsch, E., Gullberg, D., Balzac, F., Altruda, F., Silengo, L. and Tarone, G. (1994). Alpha v integrin subunit is predominantly located in nervous tissue and skeletal muscle during mouse development. *Dev. Dynam.* **201**, 108-120.
- Hogervorst, F., Kuikman, I., van Kessel, A. G. and Sonnenberg, A. (1991). Molecular cloning of the human alpha 6 integrin subunit. Alternative splicing of alpha 6 mRNA and chromosomal localization of the alpha 6 and beta 4 genes. *Eur. J. Biochem.* **199**, 425-433.

- Hogervorst, F., Admiraal, L. G., Niessen, C., Kuikman, I., Janssen, H., Daams, H. and Sonnenberg, A. (1993a). Biochemical characterization and tissue distribution of the A and B variants of the integrin alpha 6 subunit. *J. Cell Biol.* **121**, 179-191.
- Hogervorst, F., Kuikman, I., Noteboom, E. and Sonnenberg, A. (1993b). The role of phosphorylation in activation of the alpha6Aβ1 laminin receptor. *J. Biol. Chem.* **268**, 18427-18430.
- Hughes, S. M. and Blau, H. M. (1990). Migration of myoblasts across basal lamina during skeletal muscle development. *Nature* **345**, 350-353.
- Klietsch, R., Ervasti, J. M., Arnold, W., Campbell, K. P. and Jorgensen, A. O. (1993). Dystrophin-glycoprotein complex and laminin colocalize to the sarcolemma and transverse tubules of cardiac muscle. *Circul. Res.* **72**, 349-360.
- Kramer, R. H., McDonald, K. A. and Vu, M. P. (1989). Human melanoma cells express a novel integrin receptor for laminin [published erratum appears in *J. Biol. Chem.* (1989) **264**, 21432]. *J. Biol. Chem.* **264**, 15642-15649.
- Kramer, R. H., Vu, M. P., Cheng, Y. F., Ramos, D. M., Timpl, R. and Waleh, N. (1991). Laminin-binding integrin alpha 7 beta 1: functional characterization and expression in normal and malignant melanocytes. *Cell Regul.* **2**, 805-817.
- Lakonishok, M., Muschler, J. and Horwitz, A. F. (1992). The alpha 5 beta 1 integrin associates with a dystrophin-containing lattice during muscle development. *Dev. Biol.* **152**, 209-220.
- Linkhart, T. A., Clegg, C. H. and Hauschka, S. D. (1981). Myogenic differentiation in permanent clonal mouse myoblast cell lines: regulation by macromolecular growth factors in the culture medium. *Dev. Biol.* **86**, 19-30.
- Martin, P. T., Kaufman, S. J., Kramer, R. H. and Sanes, J. R. (1996). Synaptic integrins: selective association of alpha1, alpha7A and alpha7B integrins with the neuromuscular junction. *Dev. Biol.* **174**, 125-139.
- Matsumoto, K., Matsumoto, K., Nakamura, T. and Kramer, R. H. (1994). Hepatocyte growth factor/scatter factor induces tyrosine phosphorylation of focal adhesion kinase (p125FAK) and promotes migration and invasion by oral squamous cell carcinoma cells. *J. Biol. Chem.* **269**, 31807-31813.
- McDonald, K. A., Lakonishok, M. and Horwitz, A. F. (1995). Alpha v and alpha 3 integrin subunits are associated with myofibrils during myofibrillogenesis. *J. Cell Sci.* **108**, 975-983.
- Mehul, B., Doyennette-Moyne, M. A., Aubery, M., Mannherz, H. G. and Codogno, P. (1990). 5'-Nucleotidase is involved in chick embryo myoblast spreading on laminin. *Cell Biol. Int. Rep.* **14**, 155-164.
- Mehul, B., Doyennette-Moyne, M. A., Aubery, M., Codogno, P. and Mannherz, H. G. (1992). Enzymatic activity and in vivo distribution of 5'-nucleotidase, an extracellular matrix binding glycoprotein, during the development of chicken striated muscle. *Exp. Cell Res.* **203**, 62-71.
- Mendrick, D. L., Kelly, D. M., duMont, S. S. and Sandstrom, D. J. (1995). Glomerular epithelial and mesangial cells differentially modulate the binding specificities of VLA-1 and VLA-2. *Lab. Invest.* **72**, 367-375.
- Natali, P. G., Nicotra, M. R., Bigotti, A. and De Martino, C. (1992). Localization of the α6 and β4 integrin subunits in normal human non-lymphoid tissues. *J. Cell Sci.* **103**, 1243-1247.
- O'Toole, T. E., Katagiri, Y., Faull, R. J., Peter, K., Tamura, R., Quaranta, V., Loftus, J. C., Shattil, S. J. and Ginsberg, M. H. (1994). Integrin cytoplasmic domains mediate inside-out signal transduction. *J. Cell Biol.* **124**, 1047-1059.
- Ocalan, M., Goodman, S., Kuhl, U., Hauschka, S. and von der Mark, K. (1988). Laminin alters cell shape and stimulates motility and proliferation of murine skeletal myoblasts. *Dev. Biol.* **125**, 158-167.
- Pavlat, G. K., Rich, K., Webster, S. G. and Blau, H. M. (1989). Localization of muscle gene products in nuclear domains. *Nature* **337**, 570-573.
- Sanes, J. R., Engvall, E., Butkowski, R. and Hunter, D. D. (1990). Molecular heterogeneity of basal laminae: isoforms of laminin and collagen IV at the neuromuscular junction and elsewhere. *J. Cell Biol.* **111**, 1685-1699.
- Sastry, S. K., Lakonishok, M., Thomas, D. A., Muschler, J. and Horwitz, A. F. (1996). Integrin alpha subunit ratios, cytoplasmic domains and growth factor synergy regulate muscle proliferation and differentiation. *J. Cell Biol.* **133**, 169-184.
- Schreiner, C., Fisher, M., Hussein, S. and Juliano, R. L. (1991). Increased tumorigenicity of fibronectin receptor deficient Chinese hamster ovary cell variants. *Cancer Res.* **51**, 1738-1740.
- Schultz, E. and McCormick, K. M. (1994). Skeletal muscle satellite cells. *Rev. Physiol. Biochem. Pharmacol.* **123**, 213-257.
- Shaw, L. M., Lotz, M. M. and Mercurio, A. M. (1993). Inside-out integrin signaling in macrophages. Analysis of the role of the alpha 6A beta 1 and alpha 6B beta 1 integrin variants in laminin adhesion by cDNA expression in an alpha 6 integrin-deficient macrophage cell line. *J. Biol. Chem.* **268**, 11401-11408.
- Shaw, L. M. and Mercurio, A. M. (1994). Regulation of cellular interactions with laminin by integrin cytoplasmic domains: the A and B structural variants of the alpha 6 beta 1 integrin differentially modulate the adhesive strength, morphology, and migration of macrophages. *Mol. Biol. Cell* **5**, 679-690.
- Song, W. K., Wang, W., Sato, H., Bielser, D. A. and Kaufman, S. J. (1993). Expression of alpha 7 integrin cytoplasmic domains during skeletal muscle development: alternate forms, conformational change, and homologies with serine/threonine kinases and tyrosine phosphatases. *J. Cell Sci.* **106**, 1139-1152.
- Sonnenberg, A., de Melker, A. A., Martinez De Velasco, A. M., Janssen, H., Calafat, J. and Niessen, C. M. (1993). Formation of hemidesmosomes in cells of a transformed murine mammary tumor cell line and mechanisms involved in adherence of these cells to laminin and kalinin. *J. Cell Sci.* **106**, 1083-1102.
- Spinardi, L., Einheber, S., Cullen, T., Milner, T. A. and Giancotti, F. G. (1995). A recombinant tail-less integrin beta 4 subunit disrupts hemidesmosomes, but does not suppress alpha 6 beta 4-mediated cell adhesion to laminins. *J. Cell Biol.* **129**, 473-487.
- Steffensen, B., Magnuson, V. L., Potempa, C. L., Chen, D. and Klebe, R. J. (1992). Alpha 5 integrin subunit expression changes during myogenesis. *Biochim. Biophys. Acta* **1137**, 95-100.
- Tamura, R. N., Rozzo, C., Starr, L., Chambers, J., Reichardt, L. F., Cooper, H. M. and Quaranta, V. (1990). Epithelial integrin alpha 6 beta 4: complete primary structure of alpha 6 and variant forms of beta 4. *J. Cell Biol.* **111**, 1593-1604.
- Timpl, R. and Brown, J. C. (1994). The laminins. *Matrix Biol.* **14**, 275-281.
- Topp, W. C. (1981). Normal rat cell lines deficient in nuclear thymidine kinase. *Virology* **113**, 408-411.
- Vachon, P. H., Loechel, F., Xu, H., Wewer, U. M. and Engvall, E. (1996). Merosin and laminin in myogenesis; specific requirement for merosin in myotube stability and survival. *J. Cell Biol.* **134**, 1483-1497.
- van der Flier, A., Kuikman, I., Baudoin, C., van der Neut, R. and Sonnenberg, A. (1995). A novel beta 1 integrin isoform produced by alternative splicing: unique expression in cardiac and skeletal muscle. *FEBS Lett.* **369**, 340-344.
- Van Swearingen, J. and Lance-Jones, C. (1995). Slow and fast muscle fibers are preferentially derived from myoblasts migrating into the chick limb bud at different developmental times. *Dev. Biol.* **170**, 321-337.
- von der Mark, H., Durr, J., Sonnenberg, A., von der Mark, K., Deutzmann, R. and Goodman, S. L. (1991). Skeletal myoblasts utilize a novel beta 1-series integrin and not alpha 6 beta 1 for binding to the E8 and T8 fragments of laminin. *J. Biol. Chem.* **266**, 23593-23601.
- von der Mark, K. and Ocalan, M. (1989). Antagonistic effects of laminin and fibronectin on the expression of the myogenic phenotype. *Differentiation* **40**, 150-157.
- Wu, C., Fields, A. J., Kapteijn, B. A. and McDonald, J. A. (1995). The role of alpha 4 beta 1 integrin in cell motility and fibronectin matrix assembly. *J. Cell Sci.* **108**, 821-829.
- Yaffe, D. and Saxel, O. (1977). Serial passaging and differentiation of myogenic cells isolated from dystrophic mouse muscle. *Nature* **270**, 725-727.
- Yao, C.-C., Ziober, B. L., Squillace, R. M. and Kramer, R. H. (1996). Alpha7 integrin mediates cell motility and migration on specific laminin isoforms. *J. Biol. Chem.* **271**, 25598-25603.
- Zhidkova, N. I., Belkin, A. M. and Mayne, R. (1995). Novel isoform of beta 1 integrin expressed in skeletal and cardiac muscle. *Biochem. Biophys. Res. Commun.* **214**, 279-285.
- Ziober, B. L., Vu, M. P., Waleh, N., Crawford, J., Lin, C. and Kramer, R. H. (1993). Alternative extracellular and cytoplasmic domains of the integrin alpha7 subunit are differentially expressed during development. *J. Biol. Chem.* **268**, 26773-26783.
- Ziober, B. L. and Kramer, R. H. (1996). Identification and characterization of the cell type-specific and developmentally regulated alpha7 integrin gene promoter. *J. Biol. Chem.* **271**, 22915-22922.
